# Supplementary material for: Macronutrients modulate survival to infection and immunity in Drosophila
Source: PubMed Central journal article supplement (PMC7027473; doi:10.1111/1365-2656.13126), 2019-12-09

**Supplementary Figure 1.** Life expectancy Kaplan–Meier curves with 95% confidence for flies fed seven diets varying in the percentage of protein (P) (Log Rank test,  $\chi^2=3166.5$ ,  $df=6$ ,  $p\leq 0.001$ ).

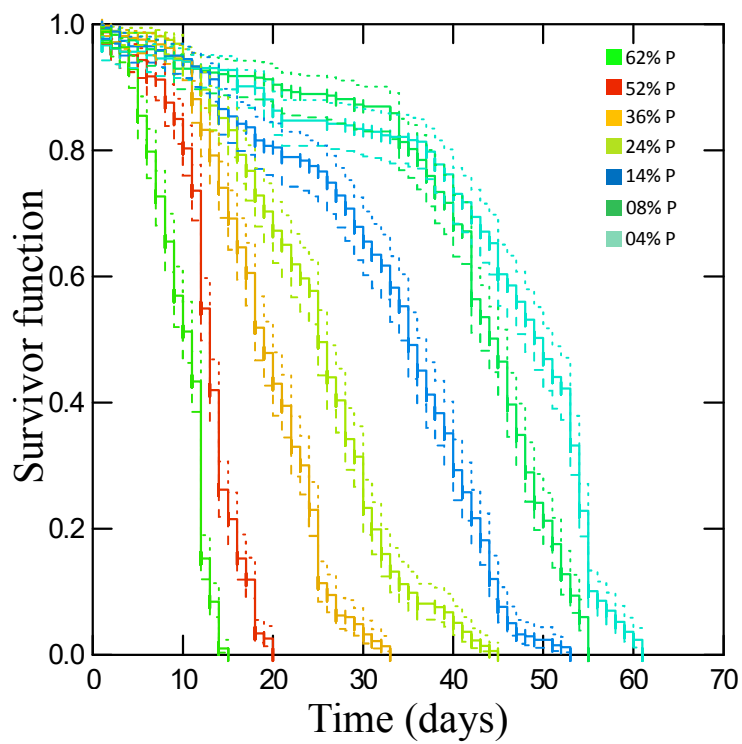

**Supplementary Figure 2.** Expression levels of immune receptors (mean  $\pm$  SE) according to the percentage of protein in the diet at: A. 25% mortality, B. 50% mortality, C. 75% mortality.

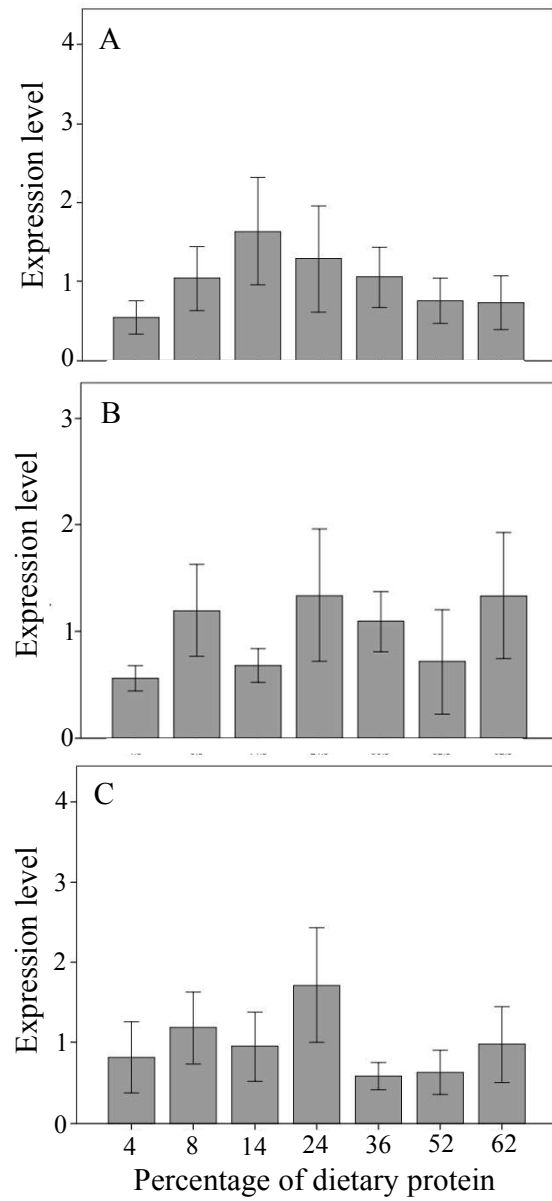

**Supplementary Figure 3.** Estimated nonparametric smooths of immune gene expression levels from the generalized additive model according to the percentage of dietary protein at 25%, 50% and 75% mortality.

**Supplementary Figure 3 (1/4) Molecules involved in the recognition of pathogens**

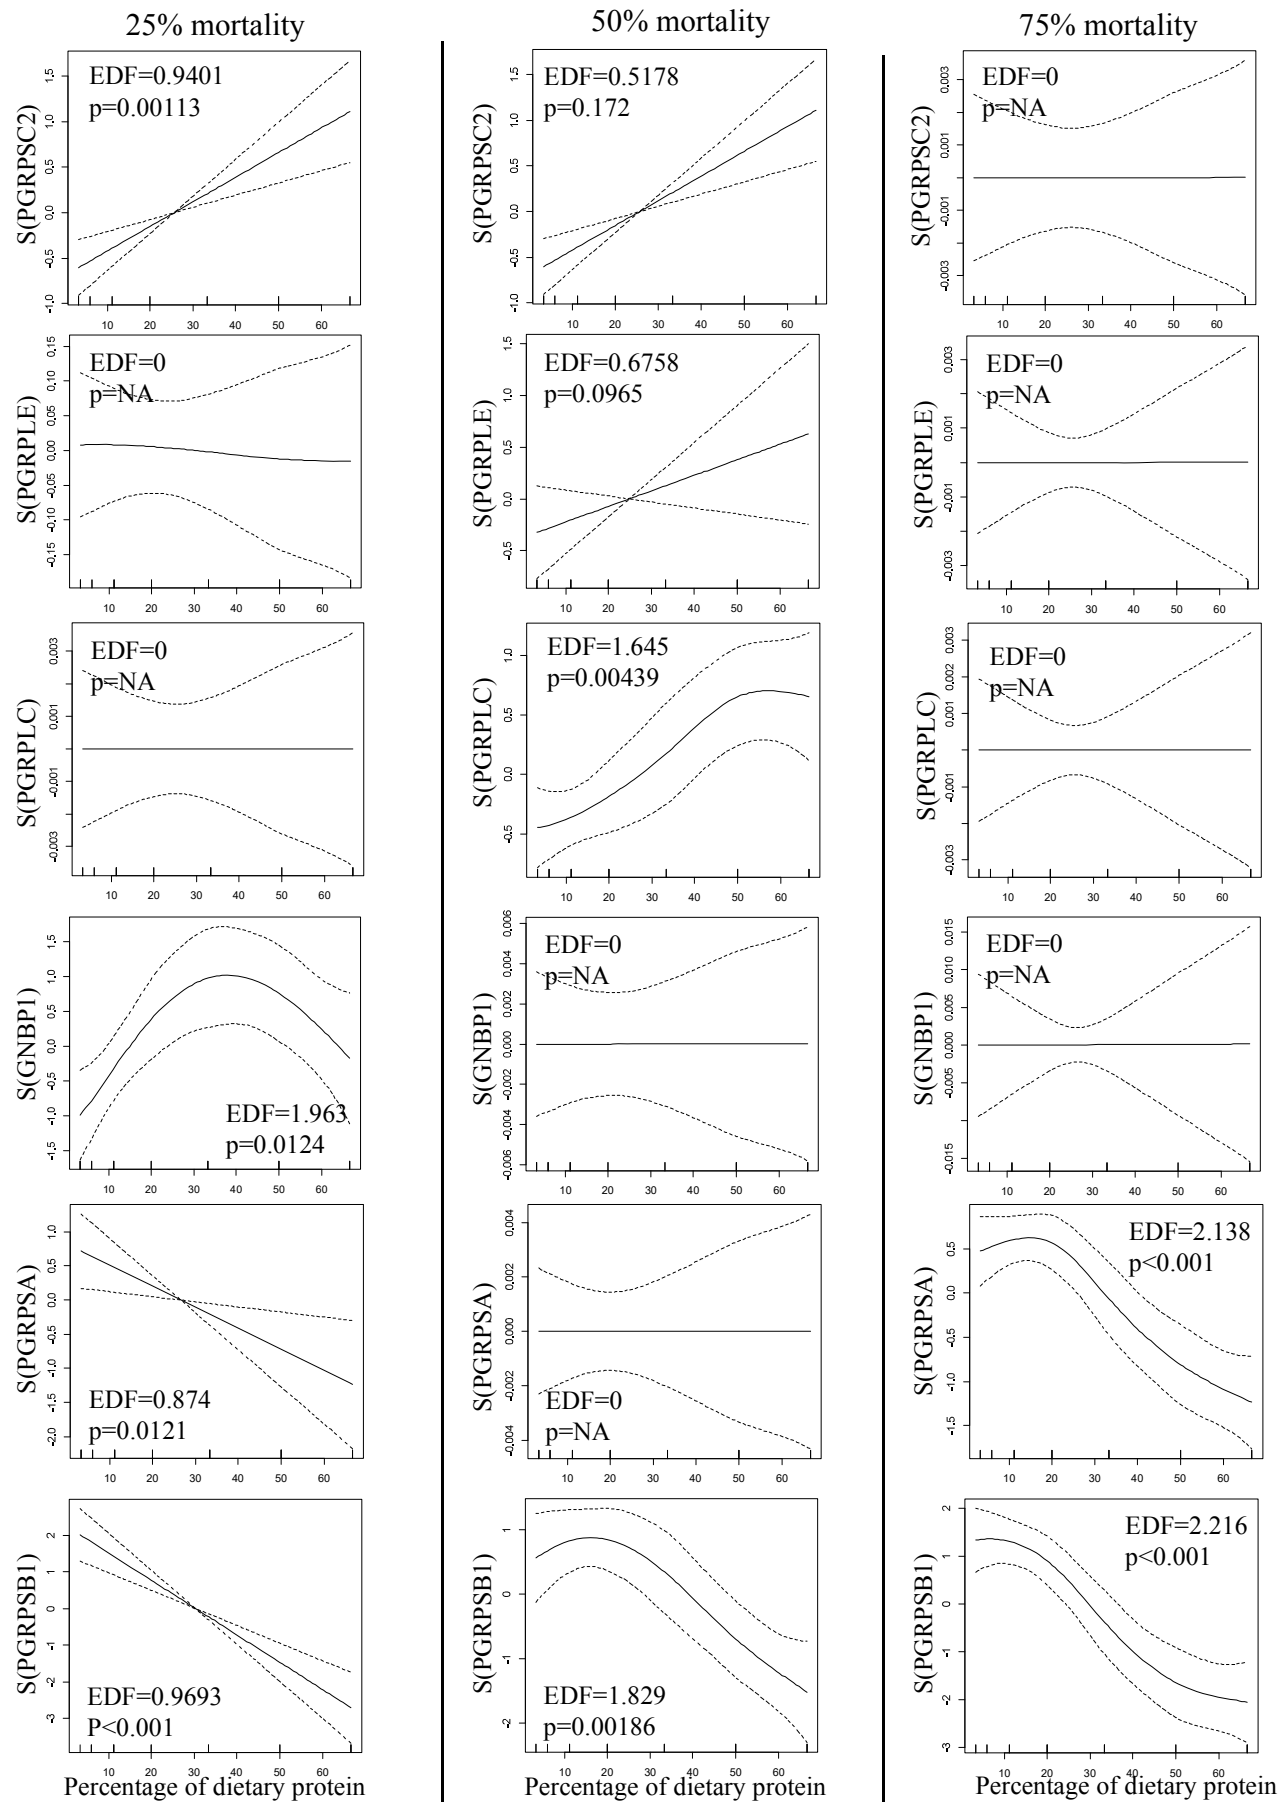

**Supplementary Figure 3 (2/4) Molecules involved in the transduction of the immune signal**

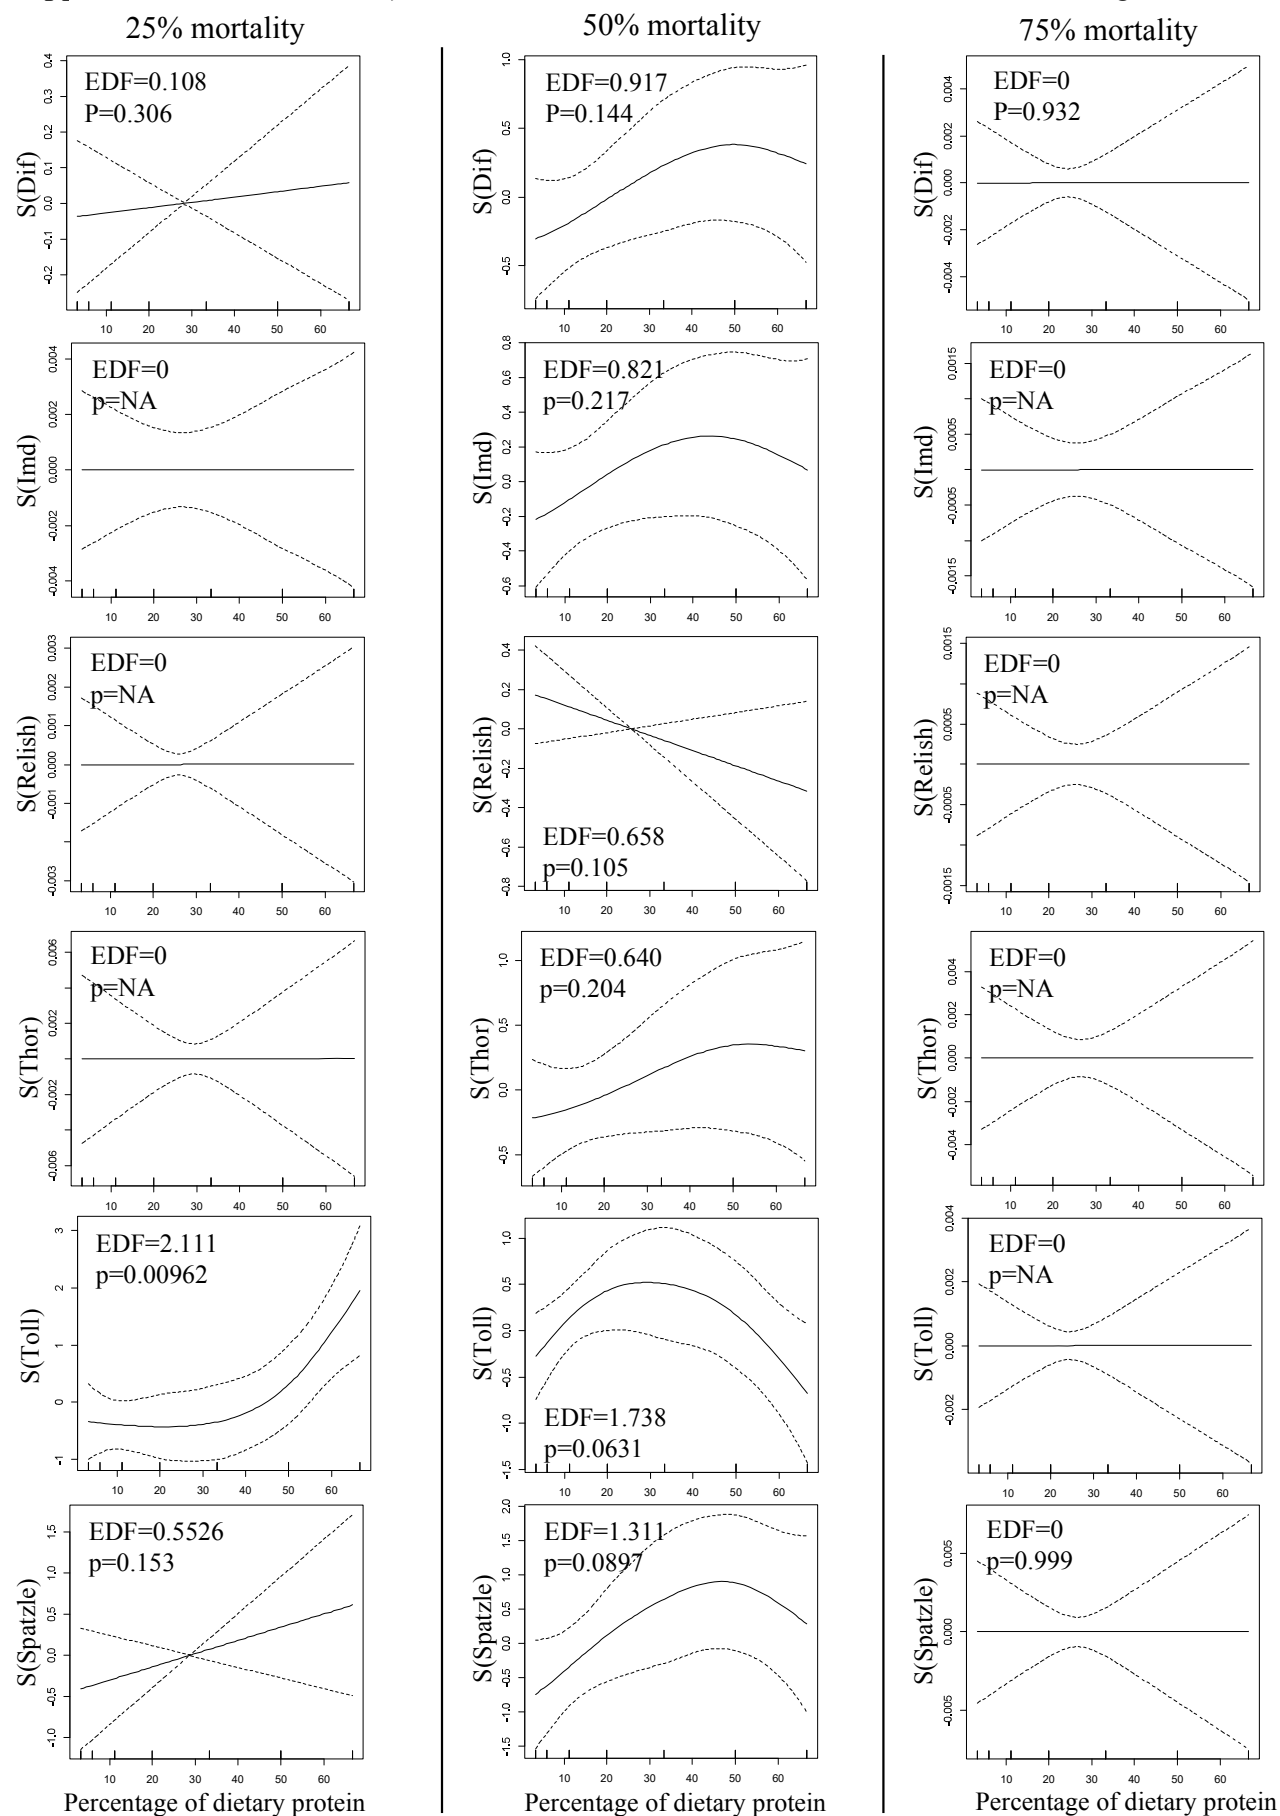

Supplementary Figure 3 (3/4) Antimicrobials

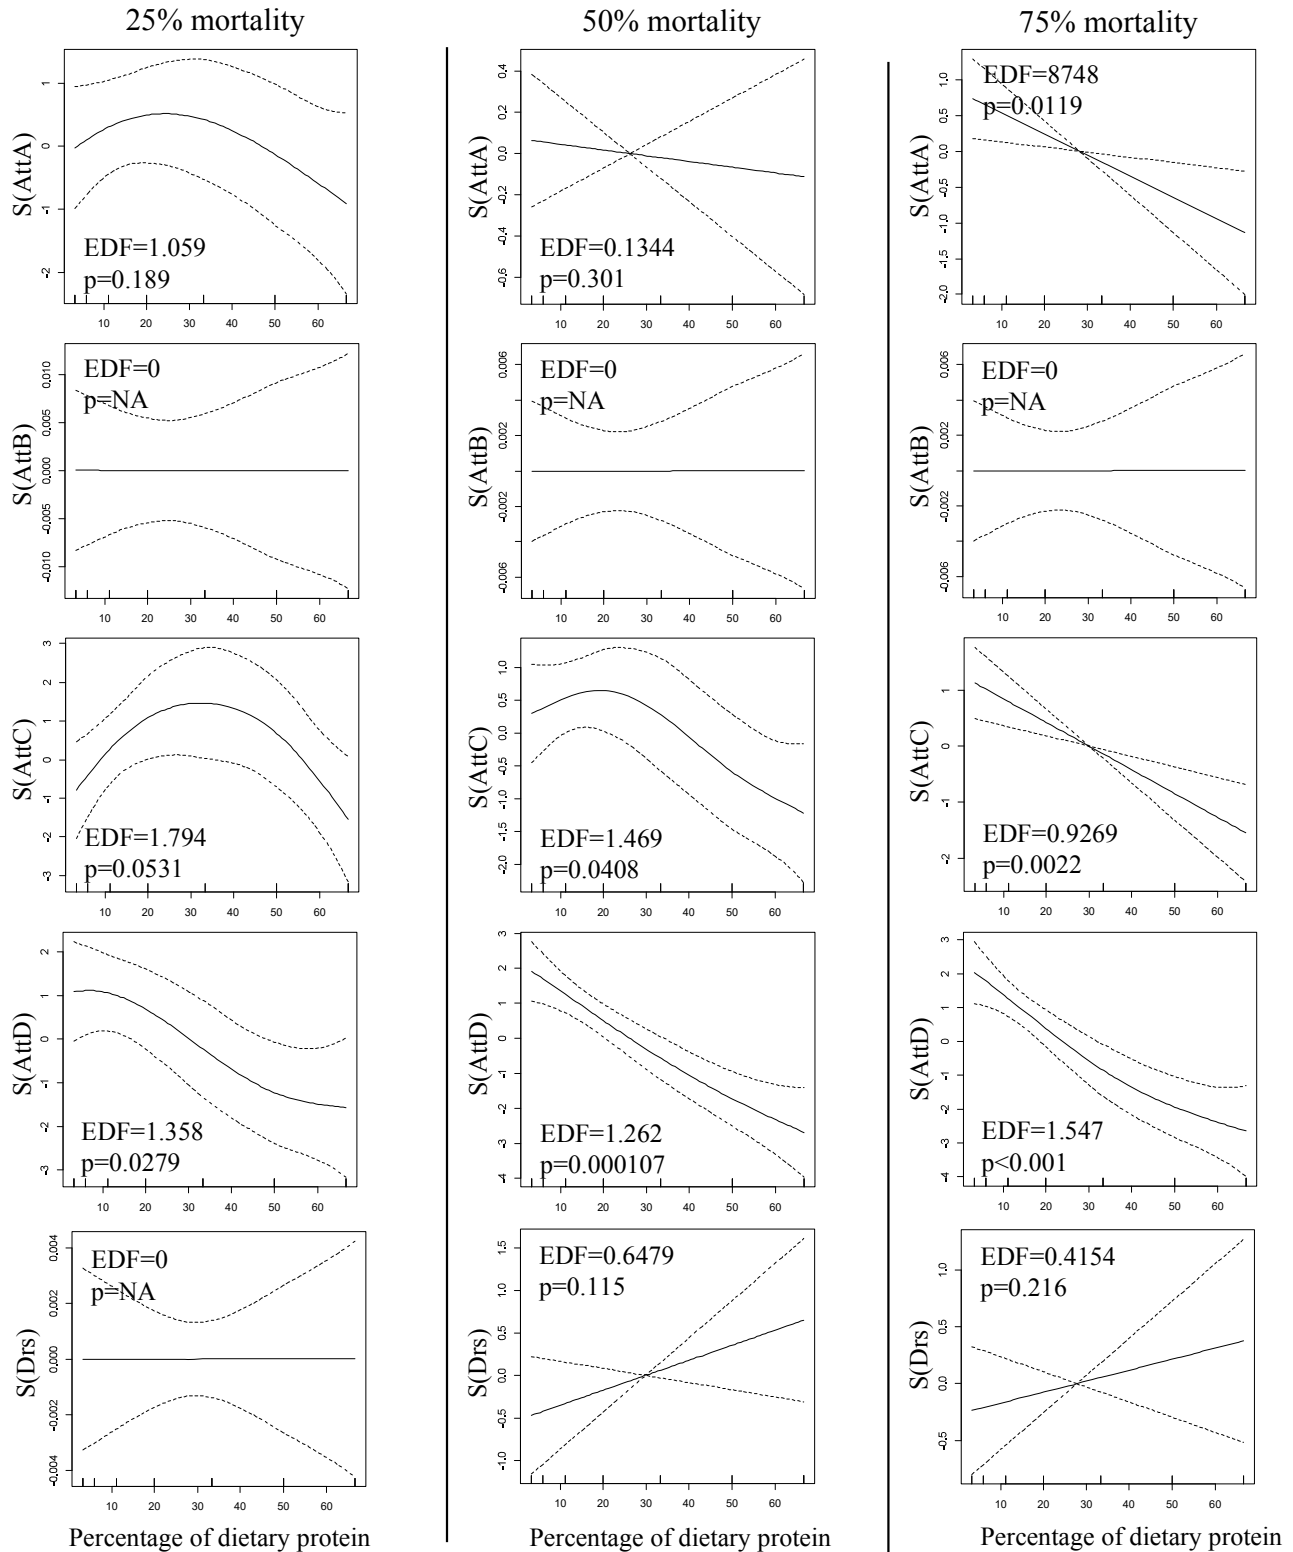

### Supplementary Figure 3 (4/4) Antimicrobials

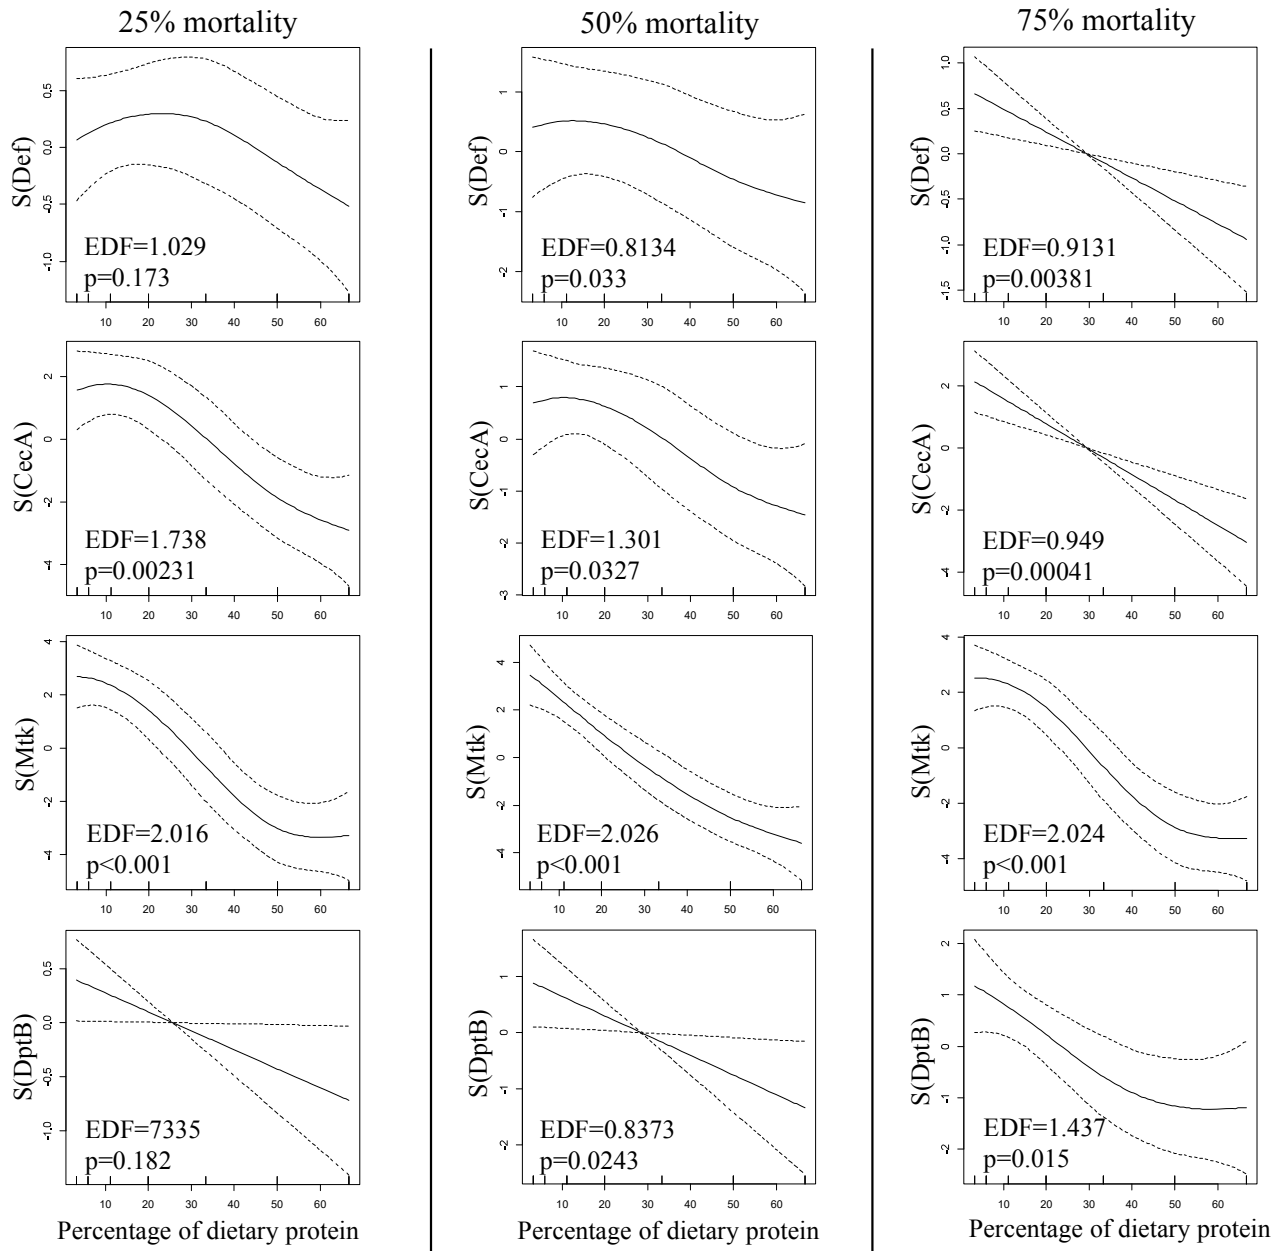

Supplement: JANE-89-460-s001.pdf [file JANE-89-460-s001.pdf]
